# Supplementary material for: Effect of cationic surfactants on structure and morphology of mesostructured MOFs
Source: Royal Society of Chemistry journal article supplement (doi:10.1039/c2ra20396k), 2012-01-01
Supplement: c2ra20396k.pdf [file c2ra20396k.pdf]

## Effect of Cationic Surfactants on Structure and Morphology of Mesostructured MOFs

Ya-Nan Guo, Yantao Li, Bo Zhi, Daojun Zhang, Yunling Liu and Qisheng Huo\*

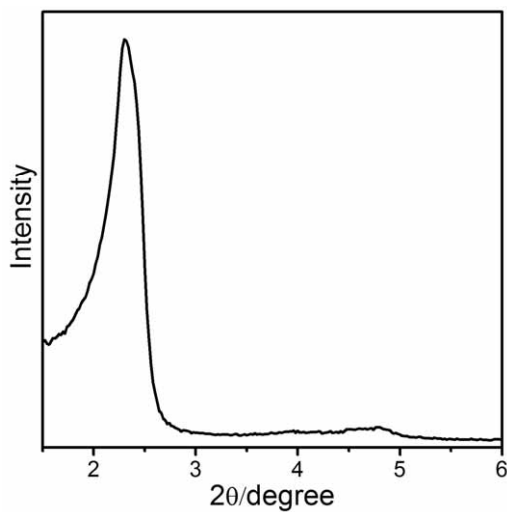

Figure S1 XRD pattern of Cu-(5-OH-BDC)-CTAB.

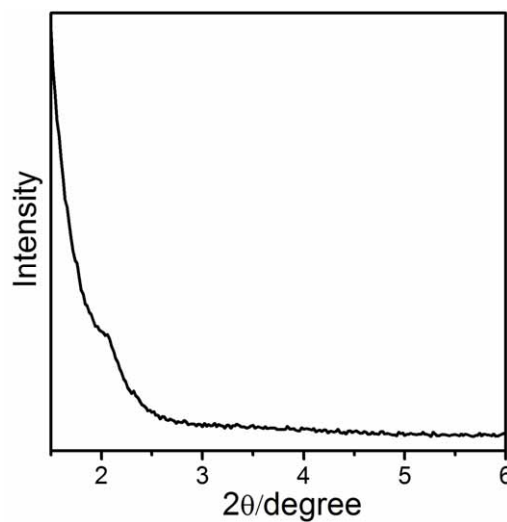

Figure S2 XRD pattern of Cu-(5-OH-BDC)-CTPB.

Supplementary Material (ESI) for Chemical Communications  
This journal is (c) The Royal Society of Chemistry 2009

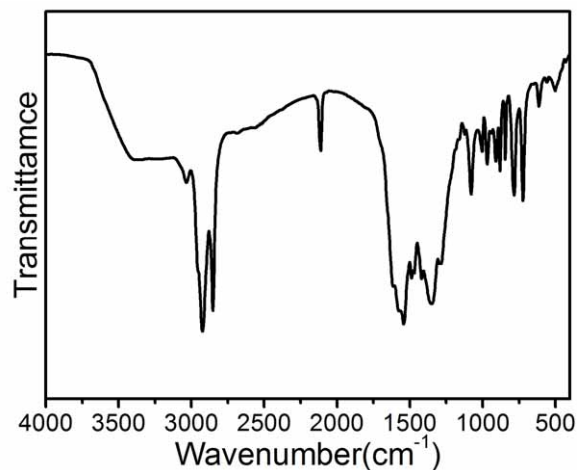

Figure S3 FT-IR spectrum of Cu-(5-OH-BDC)-CTAC meso-MOFs spheres (400 nm).

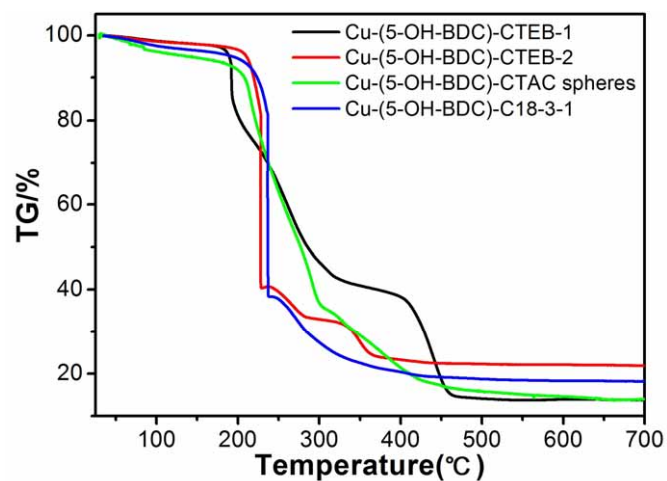

Figure S4 TG curves of meso-MOFs.
